# Supplementary material for: Comprehensive Bioinformatics Analysis of Toll-Like Receptors (TLRs) in Pan-Cancer
Source: PubMed Central journal article supplement (PMC9352480; doi:10.1155/2022/4436646), 2022-07-28
Supplement: 4436646.f1.pdf [file 4436646.f1.pdf]

Supplementary Table. Detailed information about the drug sensitivity of TLRs.

| Gene | Drug                      | cor      | pvalue      |
|------|---------------------------|----------|-------------|
| TLR9 | Fluphenazine              | 0.680496 | 2.21E-09    |
| TLR9 | Alectinib                 | 0.637334 | 4.36E-08    |
| TLR9 | Carmustine                | 0.59831  | 4.45E-07    |
| TLR7 | Alectinib                 | 0.594836 | 5.39E-07    |
| TLR9 | 7-Hydroxystaurosporine    | 0.549878 | 5.34E-06    |
| TLR9 | Etoposide                 | 0.547573 | 5.96E-06    |
| TLR9 | Imexon                    | 0.545371 | 6.61E-06    |
| TLR7 | Denileukin Diftitox Ontak | 0.540666 | 8.22E-06    |
| TLR9 | Irofulven                 | -0.5392  | 8.79E-06    |
| TLR9 | Dimethylaminoparthenolide | 0.536639 | 9.87E-06    |
| TLR9 | Hydroxyurea               | 0.535276 | 1.05E-05    |
| TLR9 | Nelarabine                | 0.534835 | 1.07E-05    |
| TLR9 | Ifosfamide                | 0.534254 | 1.10E-05    |
| TLR7 | Irofulven                 | -0.52814 | 1.44E-05    |
| TLR9 | LDK-378                   | 0.527037 | 1.52E-05    |
| TLR9 | Estramustine              | 0.514739 | 2.58E-05    |
| TLR9 | Chlorambucil              | 0.514505 | 2.61E-05    |
| TLR9 | Pipobroman                | 0.511984 | 2.90E-05    |
| TLR9 | Cyclophosphamide          | 0.510963 | 3.02E-05    |
| TLR7 | Fluphenazine              | 0.505542 | 3.79E-05    |
| TLR9 | XK-469                    | 0.496931 | 5.37E-05    |
| TLR7 | Isotretinoin              | 0.495354 | 5.72E-05    |
| TLR9 | Lomustine                 | 0.477229 | 0.000115556 |
| TLR9 | Melphalan                 | 0.476729 | 0.000117753 |
| TLR9 | Denileukin Diftitox Ontak | 0.47538  | 0.000123872 |
| TLR3 | Tyrothricin               | -0.46478 | 0.000183134 |
| TLR5 | Olaparib                  | 0.462569 | 0.000198352 |
| TLR7 | LDK-378                   | 0.461385 | 0.000206978 |
| TLR9 | Nitrogen mustard          | 0.460885 | 0.000210719 |
| TLR9 | Teniposide                | 0.457912 | 0.0002343   |
| TLR9 | Arsenic trioxide          | 0.457805 | 0.000235193 |
| TLR9 | LMP-400                   | 0.456865 | 0.000243165 |
| TLR9 | Oxaliplatin               | 0.449765 | 0.000311806 |
| TLR9 | Uracil mustard            | 0.449308 | 0.000316776 |
| TLR9 | Asparaginase              | 0.448462 | 0.000326175 |
| TLR9 | Chelerythrine             | 0.446291 | 0.000351461 |
| TLR7 | Imiquimod                 | 0.44293  | 0.000394129 |
| TLR9 | Entinostat                | 0.442212 | 0.000403846 |
| TLR7 | Megestrol acetate         | 0.433224 | 0.000545172 |
| TLR9 | PX-316                    | 0.428454 | 0.00063715  |
| TLR9 | Valrubicin                | 0.423695 | 0.000742722 |
| TLR7 | Entinostat                | 0.42301  | 0.000759159 |
| TLR1 | Denileukin Diftitox Ontak | 0.421963 | 0.000784918 |
| TLR9 | Dromostanolone Propionate | 0.421355 | 0.000800236 |
| TLR7 | Nelfinavir                | 0.418076 | 0.000887561 |
| TLR9 | Triethylenemelamine       | 0.415488 | 0.000962503 |
| TLR9 | Thiotepa                  | 0.415069 | 0.000975134 |
| TLR7 | Estramustine              | 0.41378  | 0.001015024 |
| TLR3 | Alvespimycin              | -0.4123  | 0.001062751 |
| TLR5 | Ixazomib citrate          | -0.41177 | 0.001080262 |
| TLR9 | Parthenolide              | 0.410425 | 0.001125763 |
| TLR2 | Allopurinol               | 0.40535  | 0.001314012 |
| TLR9 | Raloxifene                | 0.399475 | 0.001566914 |
| TLR9 | Bendamustine              | 0.398053 | 0.001634338 |
| TLR9 | Epirubicin                | 0.396218 | 0.001725149 |
| TLR9 | Raltitrexed               | 0.392872 | 0.00190252  |

|       |                                    |          |             |
|-------|------------------------------------|----------|-------------|
| TLR2  | ABT-199                            | 0.390289 | 0.002050378 |
| TLR5  | Precursor Intermediate to TDP 6657 | 0.385202 | 0.002372001 |
| TLR9  | Dexamethasone Decadron             | 0.381996 | 0.00259704  |
| TLR9  | Fenretinide                        | 0.380815 | 0.002684616 |
| TLR9  | Crizotinib                         | 0.379013 | 0.002823321 |
| TLR9  | Isotretinoin                       | 0.378539 | 0.002860818 |
| TLR5  | Pralatrexate                       | -0.3784  | 0.002872304 |
| TLR9  | Ethinyl estradiol                  | 0.376113 | 0.003059973 |
| TLR2  | Vinorelbine                        | -0.37428 | 0.003218563 |
| TLR9  | Belinostat                         | 0.369839 | 0.00363304  |
| TLR9  | AP-26113                           | 0.369582 | 0.003658405 |
| TLR4  | Megestrol acetate                  | 0.368833 | 0.00373326  |
| TLR7  | Elesclomol                         | 0.367962 | 0.003821994 |
| TLR3  | Chelerythrine                      | -0.36481 | 0.004159264 |
| TLR9  | Calusterone                        | 0.362582 | 0.004412711 |
| TLR3  | Idelalisib                         | 0.362436 | 0.004429786 |
| TLR9  | Palbociclib                        | 0.361447 | 0.004547231 |
| TLR7  | AP-26113                           | 0.360816 | 0.004623553 |
| TLR7  | 7-Hydroxystaurosporine             | 0.360659 | 0.004642648 |
| TLR5  | BML-277                            | -0.35842 | 0.004923183 |
| TLR7  | Dimethylaminoparthenolide          | 0.358401 | 0.004926102 |
| TLR9  | kahalide f                         | -0.35837 | 0.004930029 |
| TLR9  | Daunorubicin                       | 0.357324 | 0.005066519 |
| TLR7  | Celecoxib                          | 0.35704  | 0.005104155 |
| TLR7  | Dromostanolone Propionate          | 0.355933 | 0.005253123 |
| TLR10 | Elesclomol                         | 0.355594 | 0.005299538 |
| TLR1  | Megestrol acetate                  | 0.351035 | 0.005959208 |
| TLR9  | Perifosine                         | 0.350355 | 0.006063591 |
| TLR9  | BN-2629                            | 0.346841 | 0.006628691 |
| TLR6  | Trametinib                         | 0.346163 | 0.006743031 |
| TLR7  | Imexon                             | 0.344451 | 0.007039061 |
| TLR1  | Entinostat                         | 0.341978 | 0.007486725 |
| TLR9  | 6-Mercaptopurine                   | 0.34188  | 0.007504861 |
| TLR9  | Vorinostat                         | 0.340409 | 0.007783492 |
| TLR7  | Oxaliplatin                        | 0.340021 | 0.007858509 |
| TLR3  | Lapachone                          | -0.33918 | 0.008022417 |
| TLR2  | Elliptinium Acetate                | -0.33832 | 0.008195121 |
| TLR7  | Ethinyl estradiol                  | 0.337846 | 0.008290345 |
| TLR9  | Sonidegib                          | -0.33735 | 0.008391349 |
| TLR1  | Dasatinib                          | -0.33648 | 0.00857253  |
| TLR9  | Fostamatinib                       | 0.334964 | 0.008894472 |
| TLR5  | Oxaliplatin                        | -0.33424 | 0.009052245 |
| TLR9  | Carboplatin                        | 0.33119  | 0.009742983 |
| TLR2  | Vinblastine                        | -0.33081 | 0.00983269  |
| TLR1  | XL-147                             | 0.330646 | 0.009870915 |
| TLR10 | Imiquimod                          | 0.330327 | 0.009946741 |
| TLR7  | Tegafur                            | 0.330024 | 0.01001913  |
| TLR5  | AT-13387                           | -0.32943 | 0.010163012 |
| TLR7  | Etoposide                          | 0.327935 | 0.010530533 |
| TLR9  | Dacarbazine                        | 0.323203 | 0.011773564 |
| TLR5  | Methotrexate                       | -0.32275 | 0.011898278 |
| TLR9  | Irinotecan                         | 0.322187 | 0.012056504 |
| TLR7  | Carmustine                         | 0.322037 | 0.01209871  |
| TLR1  | Estramustine                       | 0.321226 | 0.012329305 |
| TLR5  | Nilotinib                          | -0.31958 | 0.012809705 |
| TLR5  | 3-Bromopyruvate (acid)             | -0.31836 | 0.013173716 |
| TLR9  | Dexrazoxane                        | 0.318223 | 0.013216752 |
| TLR9  | RH1                                | 0.315881 | 0.013946487 |

|       |                                        |          |             |
|-------|----------------------------------------|----------|-------------|
| TLR9  | 3-Bromopyruvate (acid)                 | 0.315431 | 0.01409051  |
| TLR1  | Acetalax                               | -0.31534 | 0.014118756 |
| TLR9  | Nelfinavir                             | 0.314338 | 0.014445923 |
| TLR1  | Pelitrexol                             | -0.3139  | 0.014589431 |
| TLR5  | Tanespimycin                           | -0.3138  | 0.014624186 |
| TLR9  | Trametinib                             | -0.31146 | 0.015419833 |
| TLR9  | Decitabine                             | 0.310392 | 0.015793336 |
| TLR1  | Ethinyl estradiol                      | 0.310288 | 0.015830446 |
| TLR5  | Dabrafenib                             | -0.31019 | 0.015863835 |
| TLR5  | Procabazine                            | 0.310093 | 0.015899794 |
| TLR4  | Isotretinoin                           | 0.307516 | 0.016842443 |
| TLR9  | Batracylin                             | 0.30545  | 0.017631918 |
| TLR9  | Pipamperone                            | 0.304986 | 0.017813756 |
| TLR2  | Paclitaxel                             | -0.304   | 0.018206181 |
| TLR7  | Belinostat                             | 0.303964 | 0.018219409 |
| TLR4  | Entinostat                             | 0.303094 | 0.018570974 |
| TLR9  | Cisplatin                              | 0.301788 | 0.019109415 |
| TLR9  | Celecoxib                              | 0.301227 | 0.019344718 |
| TLR10 | Paclitaxel                             | 0.299407 | 0.020125325 |
| TLR6  | Cobimetinib (isomer 1)                 | 0.298626 | 0.020468501 |
| TLR5  | Vincristine                            | -0.29819 | 0.020663993 |
| TLR5  | Acetalax                               | 0.296638 | 0.021364469 |
| TLR4  | AT-13387                               | -0.29556 | 0.0218647   |
| TLR9  | Fludarabine                            | 0.295055 | 0.022101646 |
| TLR7  | Epirubicin                             | 0.292304 | 0.023433471 |
| TLR2  | Actinomycin D                          | -0.29178 | 0.023694314 |
| TLR5  | Triciribine phosphate                  | 0.289795 | 0.024706953 |
| TLR10 | Entinostat                             | 0.289262 | 0.024984541 |
| TLR5  | isacodyl, active ingredient of viraple | 0.288047 | 0.025627986 |
| TLR5  | Vandetanib                             | 0.286696 | 0.026359545 |
| TLR3  | Cabozantinib                           | 0.28583  | 0.026837894 |
| TLR9  | Megestrol acetate                      | 0.285436 | 0.027057923 |
| TLR9  | Eribulin mesilate                      | 0.285418 | 0.027068106 |
| TLR5  | Itraconazole                           | 0.284816 | 0.027406991 |
| TLR4  | Lapatinib                              | -0.28458 | 0.027541793 |
| TLR9  | Tamoxifen                              | 0.282904 | 0.028507907 |
| TLR2  | Acrichine                              | -0.2829  | 0.028510138 |
| TLR6  | Chelerythrine                          | -0.28176 | 0.029185063 |
| TLR3  | geldanamycin analog                    | -0.2816  | 0.029279939 |
| TLR9  | Doxorubicin                            | 0.280755 | 0.029789383 |
| TLR9  | Triapine                               | 0.280398 | 0.030006823 |
| TLR8  | Paclitaxel                             | 0.279363 | 0.030644879 |
| TLR9  | Cytarabine                             | 0.279085 | 0.030817987 |
| TLR9  | Mitoxantrone                           | 0.278547 | 0.031155429 |
| TLR9  | Dasatinib                              | -0.27788 | 0.031578947 |
| TLR9  | Tegafur                                | 0.276507 | 0.032464498 |
| TLR3  | O-6-Benzylguanine                      | 0.275985 | 0.032806358 |
| TLR6  | Acetalax                               | -0.27595 | 0.032831005 |
| TLR1  | 3-Bromopyruvate (acid)                 | -0.2757  | 0.032993082 |
| TLR4  | Acetalax                               | -0.27476 | 0.033621244 |
| TLR10 | Azacitidine                            | 0.274709 | 0.033655248 |
| TLR1  | isacodyl, active ingredient of viraple | -0.27429 | 0.033941088 |
| TLR2  | BML-277                                | 0.274058 | 0.034095077 |
| TLR9  | Imiquimod                              | 0.272823 | 0.034943794 |
| TLR2  | Epirubicin                             | -0.27119 | 0.036094706 |
| TLR7  | Valrubicin                             | 0.270402 | 0.036656793 |
| TLR7  | Teniposide                             | 0.269452 | 0.03734849  |
| TLR5  | Gefitinib                              | 0.268831 | 0.037805617 |

|       |                        |          |             |
|-------|------------------------|----------|-------------|
| TLR6  | XL-147                 | 0.268328 | 0.038179728 |
| TLR6  | Gefitinib              | 0.266974 | 0.039201889 |
| TLR6  | 3-Bromopyruvate (acid) | -0.26676 | 0.039364857 |
| TLR9  | Idarubicin             | 0.265841 | 0.040074359 |
| TLR1  | Isotretinoin           | 0.265743 | 0.040150461 |
| TLR5  | RH1                    | -0.26483 | 0.040864715 |
| TLR4  | By-Product of CUDC-305 | -0.2647  | 0.040966634 |
| TLR1  | ABT-199                | 0.264652 | 0.041007554 |
| TLR6  | Midostaurin            | -0.26406 | 0.041479682 |
| TLR6  | Entinostat             | 0.263522 | 0.041910237 |
| TLR4  | okadaic acid           | 0.262281 | 0.042921128 |
| TLR1  | Selumetinib            | 0.261341 | 0.043699796 |
| TLR8  | Elesclomol             | 0.261175 | 0.04383875  |
| TLR1  | okadaic acid           | 0.260784 | 0.044167008 |
| TLR4  | Ibrutinib              | -0.26053 | 0.044383554 |
| TLR5  | Lapachone              | -0.2601  | 0.044744843 |
| TLR7  | Ifosfamide             | 0.259879 | 0.044934312 |
| TLR10 | Tegafur                | 0.259877 | 0.044936164 |
| TLR7  | Eribulin mesilate      | 0.258361 | 0.046246627 |
| TLR3  | Ibrutinib              | 0.258267 | 0.046328457 |
| TLR2  | Staurosporine          | 0.257788 | 0.046749207 |
| TLR3  | Axitinib               | 0.257271 | 0.047207891 |
| TLR1  | Cobimetinib (isomer 1) | 0.256934 | 0.047508414 |
| TLR2  | Tyrothricin            | -0.25689 | 0.04754907  |
| TLR8  | Benzimate              | 0.256822 | 0.047608351 |
| TLR2  | Calusterone            | 0.256746 | 0.047676271 |
| TLR2  | Eribulin mesilate      | -0.25639 | 0.047997908 |
| TLR6  | Fenretinide            | -0.25625 | 0.048122288 |
| TLR1  | Triciribine phosphate  | -0.25549 | 0.048812041 |
| TLR7  | Salinomycin            | 0.254519 | 0.049707352 |
